# Supplementary material for: Review Article: Leveraging Social Media for Managing Natural Hazard Disasters: A Critical Review of Data Collection Strategies and Actionable Insights
Source: Copernicus journal article supplement (doi:10.5194/egusphere-2024-1536), 2024-06-17
Supplement: Supplementary file [file egusphere-2024-1536-RC2-supplement.pdf]

Thank you very much for your thorough response. With the additional analysis and proposed changes I do not have any more doubts regarding the manuscript
